# Supplementary material
Source: PubMed Central journal article supplement (PMC5819600)
Supplement: NIHMS940927-supplement-supplement_1.pdf [file NIHMS940927-supplement-supplement_1.pdf]

**Supplementary Figures:**

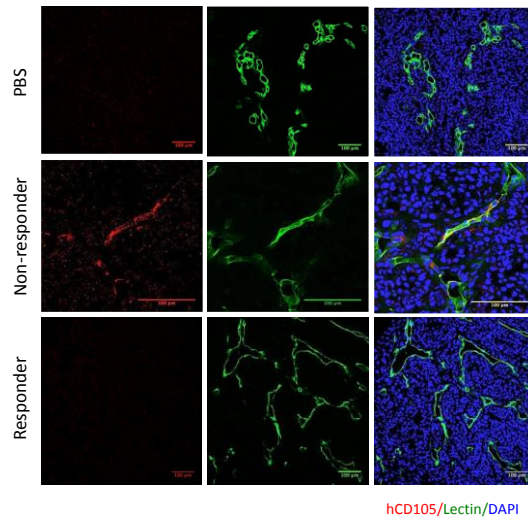

**Figure S1. Expression of human CD105 in treated tumors.** (A) Confocal images showing human-specific anti-CD105 staining in treated and control tumors. Lectin, green; hCD105, red; DAPI-stained nuclei, blue. (Scale bars, 100  $\mu\text{m}$ ).

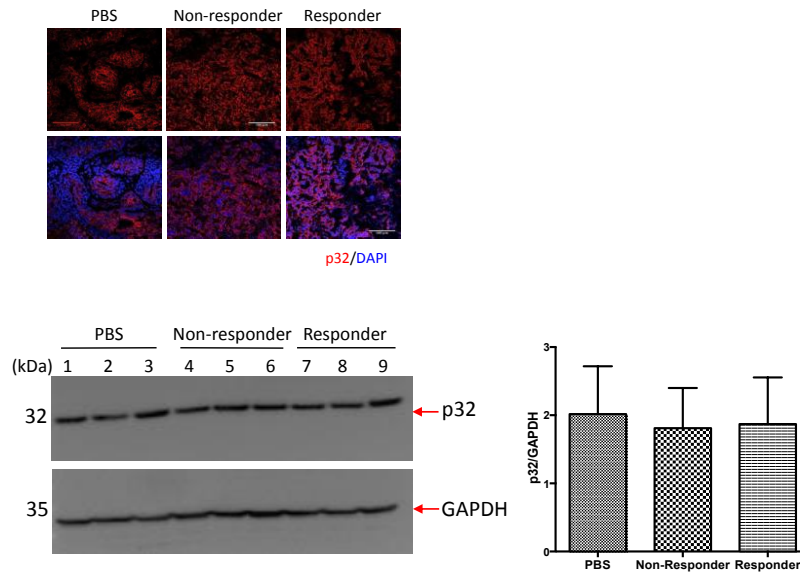

**Figure S2. Expression of the receptor for the nanosystem, p32, in treated tumors.** (A) Sections from treated and control tumors were stained with anti-p32 (red) and examined by confocal microscopy. (B) Immunoblot analysis of p32 expression in treated tumors. The bar diagram shows densitometry quantification of p32 expression normalized to the housekeeping gene GAPDH.

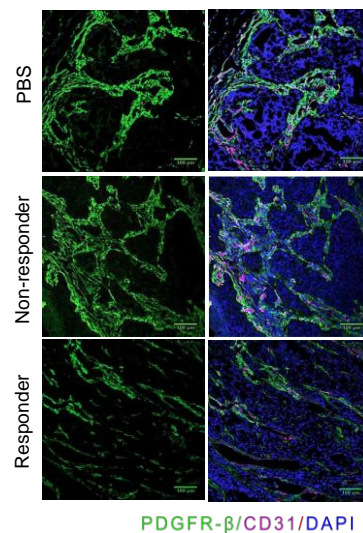

**Figure S3. PDGFR-β expression in treated tumors.** (PDGFR-β, green; CD31, red; DAPI-stained nuclei, blue. (Scale bars, 100 μm).

**Suppl Table S1. Microarray analysis of treated tumors.**

**Gene      Fold-Change (Non-responder vs.Responder)**

**Genes up-regulated during EMT/mesenchymal phenotype (non-responder):**

|        |      |
|--------|------|
| MMP13  | 4.3  |
| ITGA6  | 4    |
| S100A4 | 3.3  |
| COL1A2 | 2.6  |
| SNAIL2 | 2.2  |
| ITGB3  | 2.2  |
| ITGB6  | 2    |
| ITGB4  | 1.6  |
| COI6A1 | 1.6  |
| COI6A2 | 1.55 |

**Genes up-regulated during apoptosis/tumor suppressor (non-responder):**

|         |     |
|---------|-----|
| RAN     | 2   |
| PCDHB9  | 2.1 |
| TREX-1  | 2   |
| CLK3    | 2   |
| TTF2    | 1.9 |
| RanBP2  | 1.8 |
| CCDC125 | 1.7 |
| COX-19  | 1.6 |
| Pim1    | 1.5 |
| CSDC1   | 1.5 |
| GPR137  | 1.5 |

**Genes up-regulated during drug-resistance/metabolism (non-responder):**

|               |     |
|---------------|-----|
| NGAL          | 4   |
| Calgranulin B | 3.3 |
| Hmox1         | 3   |
| HE4           | 3   |
| SLC13         | 2.2 |
| CHI3L1        | 2   |
| SLC44A4       | 1.8 |
| H2AX          | 1.8 |
| ATP1B1        | 1.7 |
| SLC44A2       | 1.7 |
| AHR           | 1.7 |
| TAP2          | 1.6 |

**Genes up-regulated during angiogenesis/inflammation/cancer stem cells (non-responder):**

|      |     |
|------|-----|
| Stf1 | 6.7 |
| Stf2 | 6.5 |



**Gene**      **Fold-Change (Non-responder vs.Responder)**

**Genes up-regulated during EMT/mesenchymal phenotype (non-responder):**

|        |      |
|--------|------|
| MMP13  | 4.3  |
| ITGA6  | 4    |
| S100A4 | 3.3  |
| COL1A2 | 2.6  |
| SNAIL2 | 2.2  |
| ITGB3  | 2.2  |
| ITGB6  | 2    |
| ITGB4  | 1.6  |
| COL6A1 | 1.6  |
| COL6A2 | 1.55 |

**Genes up-regulated during apoptosis/tumor suppressor (non-responder):**

|         |     |
|---------|-----|
| RAN     | 2   |
| PCDHB9  | 2.1 |
| TREX-1  | 2   |
| CLK3    | 2   |
| TTF2    | 1.9 |
| RanBP2  | 1.8 |
| CCDC125 | 1.7 |
| COX-19  | 1.6 |
| Pim1    | 1.5 |
| CSDC1   | 1.5 |
| GPR137  | 1.5 |

**Genes up-regulated during drug-resistance/metabolism (non-responder):**

|               |     |
|---------------|-----|
| NGAL          | 4   |
| Calgranulin B | 3.3 |
| Hmox1         | 3   |
| HE4           | 3   |
| SLC13         | 2.2 |
| CHI3L1        | 2   |
| SLC44A4       | 1.8 |
| H2AX          | 1.8 |
| ATP1B1        | 1.7 |
| SLC44A2       | 1.7 |
| AHR           | 1.7 |
| TAP2          | 1.6 |

**Genes up-regulated during angiogenesis/inflammation/cancer stem cells (no**

|      |     |
|------|-----|
| Stf1 | 6.7 |
| Stf2 | 6.5 |

|          |     |
|----------|-----|
| ITGA6    | 4   |
| SERPINE1 | 2   |
| CXCL10   | 1.7 |
| MiR221   | 1.7 |
| p63      | 1.6 |
| FGF      | 1.6 |
| EGF      | 1.5 |
| CD300    | 1.5 |
| Igfbp2   | 1.5 |

**Genes up-regulated during apoptosis/tumor suppressor (responder):**

|         |     |
|---------|-----|
| SATL1   | 2   |
| BIK     | 2   |
| PERP    | 1.8 |
| TSC1    | 1.8 |
| TNFSF14 | 1.7 |
| IL10    | 1.7 |
| PTPLAD2 | 1.7 |
| PARP10  | 1.6 |
| CD40    | 1.5 |
| TNF-R1  | 1.5 |
| Trp53bp | 1.5 |
